# Supplementary material for: Insight into the Pore Structures and Its Impacts on Movable Fluid in Tight Sandstones
Source: Hindawi journal article supplement (doi:10.1155/2020/8820023), 2020-12-17
Supplement: f1 [file 8820023.f1.doc]

**Table S1**

Statistics of macro and micro parameters in the research area. ((+) means positive correlation, (-) means negative correlation, A represent reservoirs with the intergranular-dissolved pore type, B represent reservoirs with the dissolved-intercrystalline pore type, C represent reservoirs with pore plus micro-cracks)

| No. | Movable fluid percentage/% | Permeability/×10-3μm2 | Mainstream throat radius/μm | Average throat radius /μm | Sorting coefficient | Pore-throat ratio | Reservoir type |
| --- | --- | --- | --- | --- | --- | --- | --- |
| 1# | 83.62 | 0.59 | 2.09 | 1.46 | 0.89 | 137.08 | A |
| 2# | 81.29 | 0.37 | 1.26 | 0.74 | 0.43 | 201.83 | A |
| 3# | 55.14 | 0.14 | 0.53 | 0.42 | 0.18 | 284.14 | B |
| 4# | 44.53 | 0.13 | 0.56 | 0.44 | 0.16 | 350.74 | B |
| 5# | 23.68 | 1.42 | 1.73 | 1.01 | 0.91 | 359.72 | C |
| 6# | 17.18 | 0.23 | 0.45 | 0.41 | 0.21 | 583.39 | B |
| 7# | 15.60 | 0.08 | 0.45 | 0.41 | 0.12 | 331.99 | B |
| 8# | 7.73 | 0.30 | 0.45 | 0.40 | 0.25 | 351.24 | B |

**Table S2**

**Statistics of clay content and wettability index in the research area**

| No. | Clay mineral absolute content /% | | | | Total/% | Contact angle |
| --- | --- | --- | --- | --- | --- | --- |
| Chlorite | Kaolinite | Illite | Illite/smectite mixed layer |
| 1# | 0.32 | 1.28 | 0.46 | 0.07 | 2.14 | 46.54 |
| 2# | 0.66 | 4.29 | 0.89 | 0.59 | 6.44 | 45.54 |
| 3# | 0.06 | 2.61 | 0.12 | 0.08 | 2.87 | 44.03 |
| 4# | 0 | 1.98 | 0.23 | 0.12 | 2.33 | 43.34 |
| 5# | 0.18 | 0.55 | 3.13 | 0.61 | 4.47 | 44.34 |
| 6# | 0.12 | 4.54 | 1.15 | 0.41 | 6.22 | 47.87 |
| 7# | 0.66 | 1.16 | 0.92 | 0.24 | 2.98 | 41.21 |
| 8# | 0.5 | 1.18 | 2.04 | 0.32 | 4.04 | 40.98 |
